# Supplementary material for: Metacell-2: a divide-and-conquer metacell algorithm for scalable scRNA-seq analysis
Source: PubMed Central journal article supplement (PMC9019975; doi:10.1186/s13059-022-02667-1), 2022-04-19
Supplement: 13059_2022_2667_MOESM1_ESM.pdf [file 13059_2022_2667_MOESM1_ESM.pdf]

# Supplementary Figures

## Figure S1: More detailed schematics of the MC2 algorithm

The input is a large UMI matrix, MC2 is a recursive two-phase process working as follows: **I**, Preprocessing detecting rare gene modules and metacells based on them and move these directly to the output, **II**, dividing all cells into random piles. **III** – graph partition defines metacells in each pile. **IV**, outlier cells are removed from metacells into specialized piles, used to create additional (rare) metacells (recursively). **V**, MC2 groups metacells into metagroups (recursively). **VI**, metagroups are used as new homogeneous piles. **VII**, Generation of metacells in 2<sup>nd</sup> iteration piles. **VIII**. Remaining outliers collected from 2<sup>nd</sup> iteration piles, further grouped into rare metacells, with detection of final outliers. The final output is a set of final metacells and outliers.

## Figure S2: MC2 models for PBMC with and without divide and conquer

- A. Heatmap showing marker gene expression (log<sub>2</sub> normalized compared to median) for the non DAC MC2 model.
- B. Heatmap showing marker gene expression (log<sub>2</sub> normalized compared to median) for the DAC MC2 model.
- C. Gene expression per metacell for select T-cell genes as in Baran et al.

## Figure S3: Bone marrow MC models

- A. Heatmap showing marker gene expression (log<sub>2</sub> normalized compared to median) for the bone marrow global model.
- B. Marker gene expression for the MC2 models constructed using only HSC/MPP cells.

## Figure S4: Organogenesis cell types vs. metacell clusters

Matrix is showing the number of cells in each combination of metacell cluster and organogenesis atlas cell type.

## Figure S5: Metacell structure within broad cell types

Marker heat map (log<sub>2</sub> gene expression normalized to the median over all metacell) is shown for metacells within the epithelial (29-31, A) and endothelial (18-19, B) metacell clusters. Rich combinatorial and quantitative variation is observed within each of the broader cell types, setting the stage for in-depth follow up analysis.

## Table T1: Default main parameters

Default values for the main parameters controlling the Metacell2 pipeline.

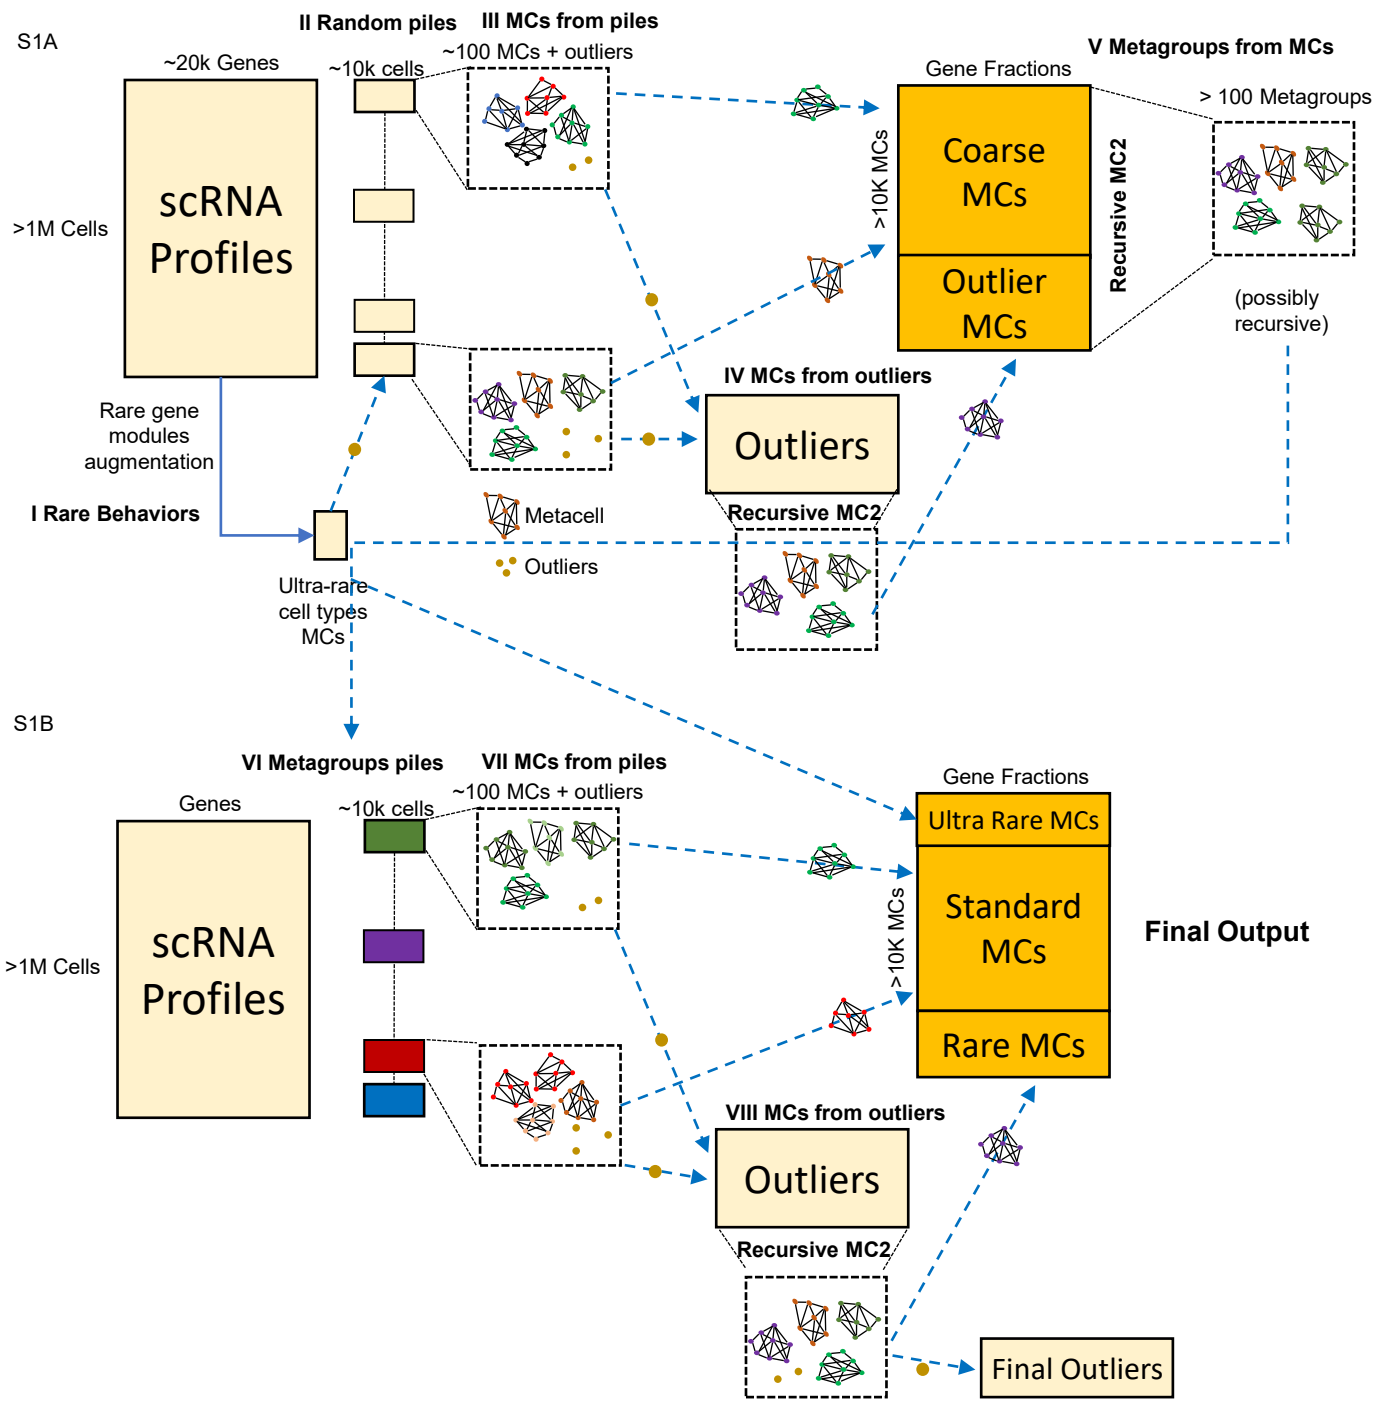

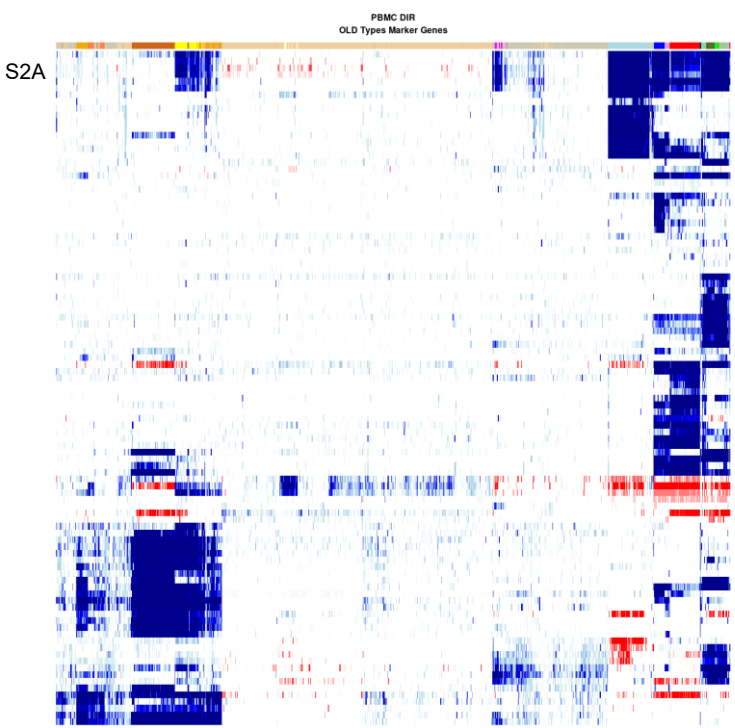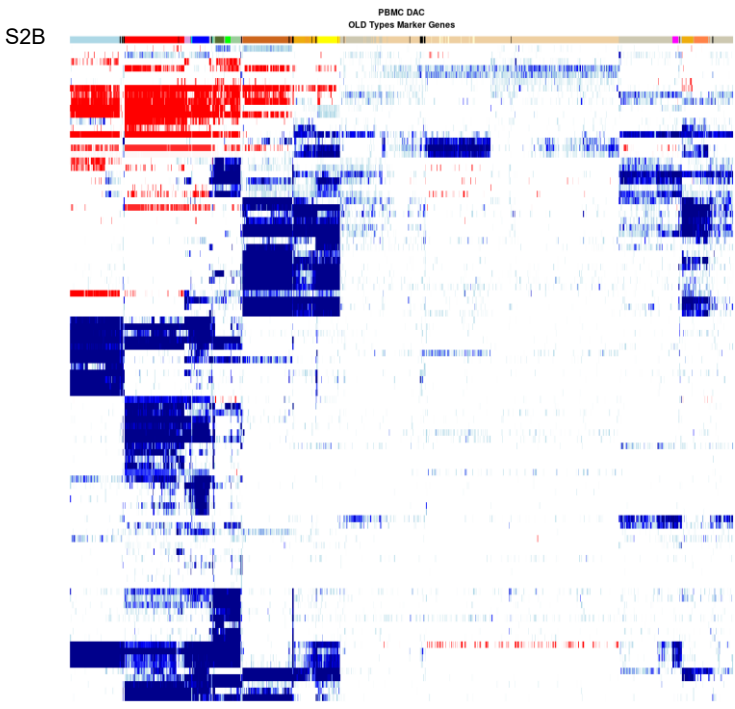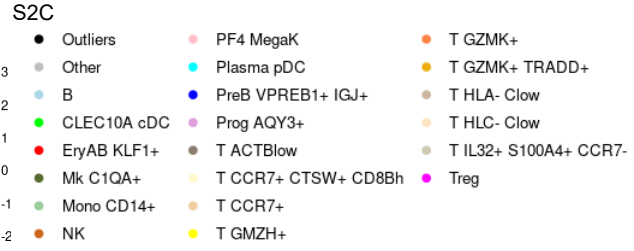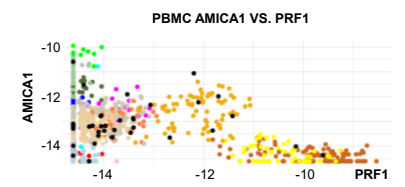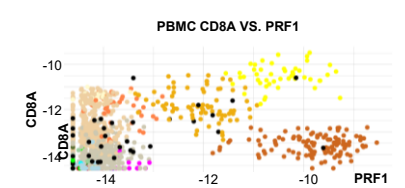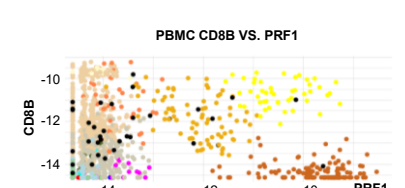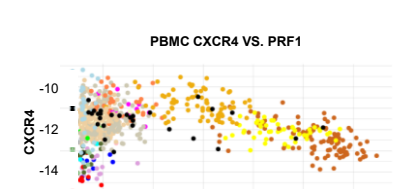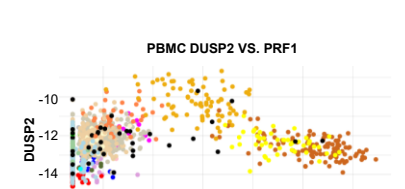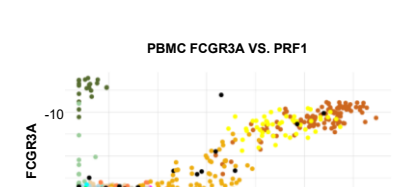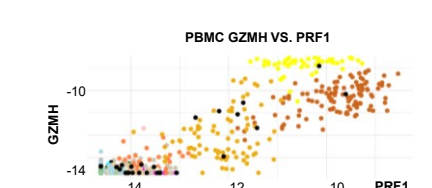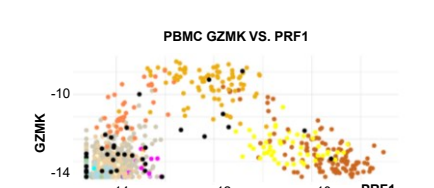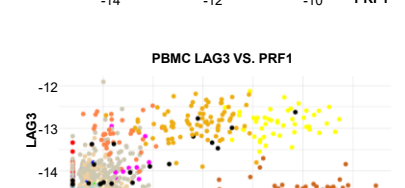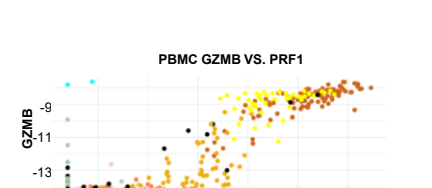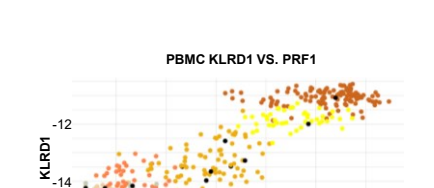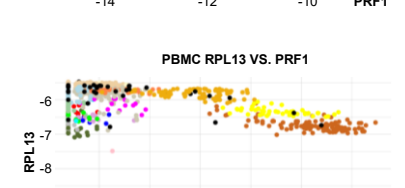

S3A

HCA.BM DAC  
Annotation Types Marker Genes

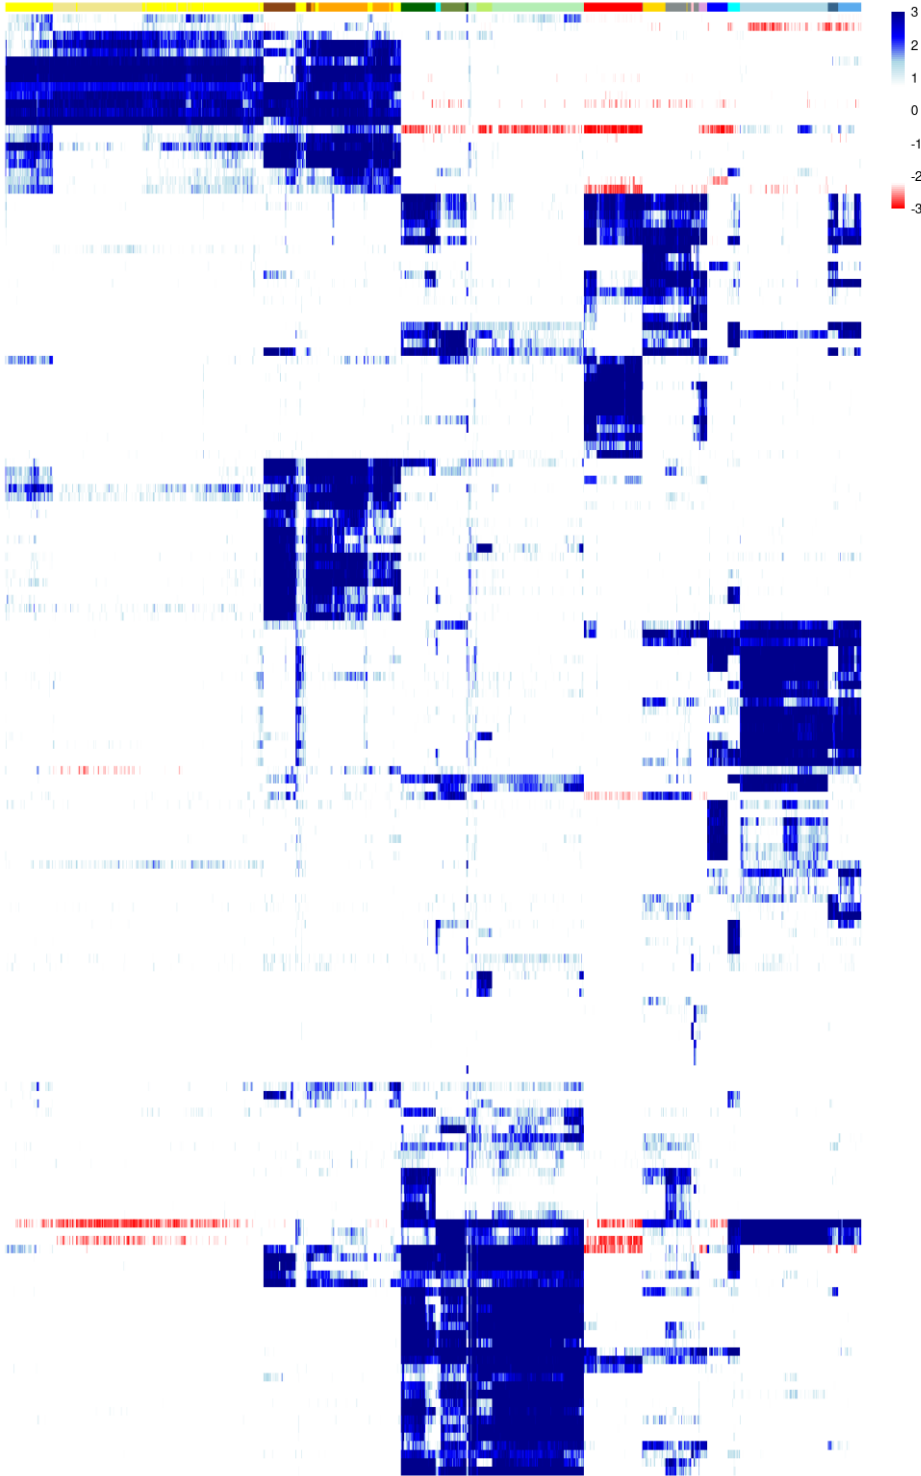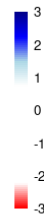

- HSC
- MPP
- LMPP
- CMP
- masBasP
- MDP1
- early\_Ery
- Ery
- stromal
- MDP2
- GMP
- pro-B
- plasma
- B
- NK
- MK
- T\_naive
- CD8
- T
- monP
- neutP
- Other

S3B

HCA.BM FEW FEW  
ALL Types Marker Genes

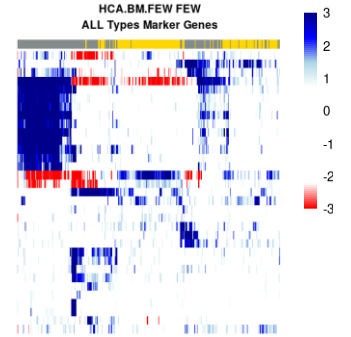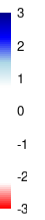

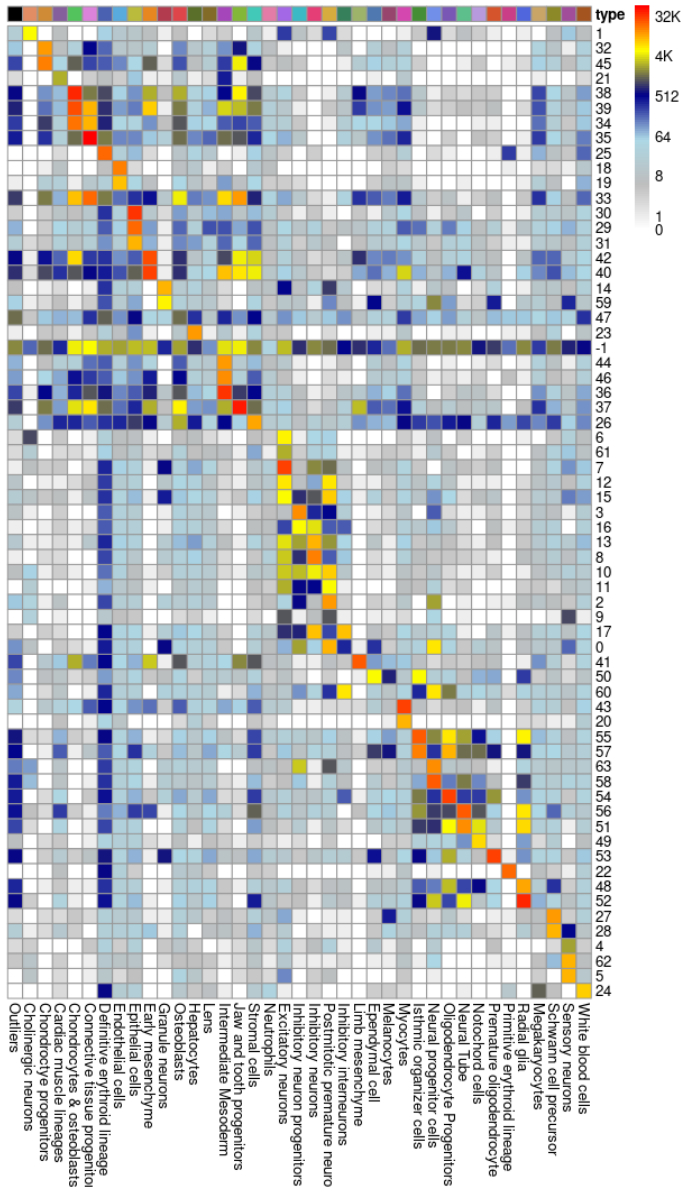

S5A

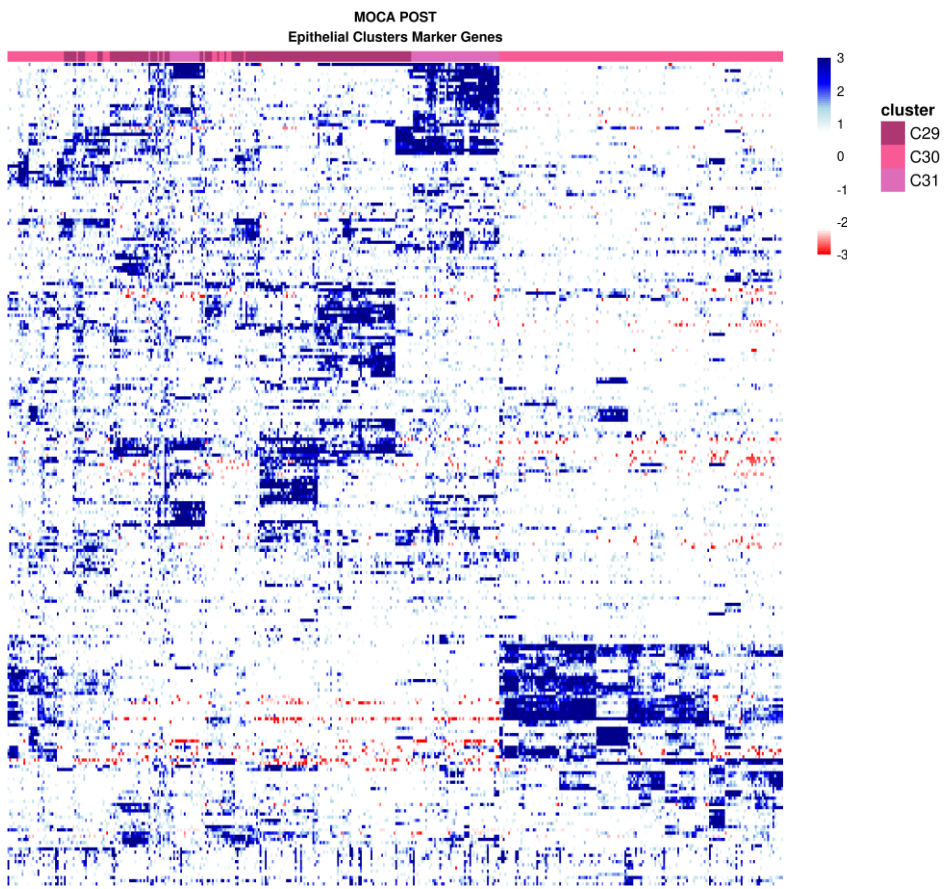

S5B

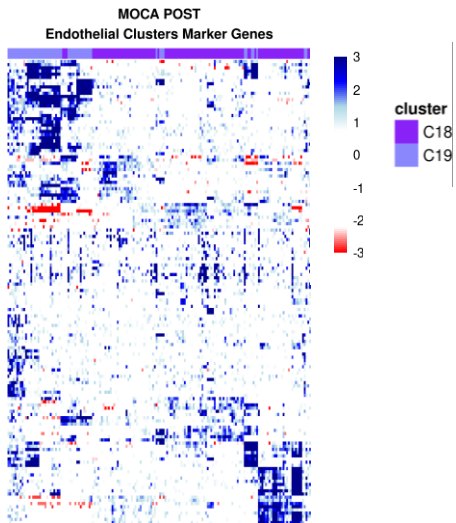

## Metacells Main Adjustable Parameters

| Parameter                            | Default                                     | Description                                                                                                  |
|--------------------------------------|---------------------------------------------|--------------------------------------------------------------------------------------------------------------|
| rare_max_gene_cell_fraction          | 0.001 (0.1%)                                | The maximal fraction of the cells where a gene is expressed to be considered "rare"                          |
| rare_min_gene_maximum                | 7                                           | The minimal maximum-across-all-cells value of a gene to be considered as a candidate for rare gene modules   |
| rare_min_genes_of_modules            | 4                                           | The minimal number of genes in a rare gene module                                                            |
| rare_min_cells_of_modules            | 12                                          | The minimal number of cells in a rare gene module                                                            |
| rare_min_cell_module_total           | 4                                           | The minimal number of UMIs of a rare gene module in a cell to be considered as expressing the rare behavior  |
| rare_max_cells_of_random_pile        | 48                                          | The maximal mean number of cells in a random pile for a rare gene module to be considered rare               |
| feature_downsample_min_samples       | 750                                         | The minimal samples to use for downsampling the cells for computing "feature" genes                          |
| feature_downsample_min_cell_quantile | 0.05 (5%)                                   | The minimal quantile of the cells total size to use for downsampling the cells for computing "feature" genes |
| feature_downsample_max_cell_quantile | 0.5 (50%)                                   | The maximal quantile of the cells total size to use for downsampling the cells for computing "feature" genes |
| feature_min_gene_total               | 50                                          | The minimal number of downsampled UMIs of a gene to be considered a "feature"                                |
| feature_min_gene_top3                | 4                                           | The minimal number of the top-3rd downsampled UMIs of a gene to be considered a "feature"                    |
| feature_min_gene_relative_variance   | 0.1                                         | The minimal relative variance of a gene to be considered a "feature"                                         |
| forbidden_gene_names                 | None                                        | Genes forbidden from being a "feature"                                                                       |
| forbidden_gene_patterns              | None                                        | Genes forbidden from being a "feature"                                                                       |
| target_metacells_in_pile             | 100                                         | The target number of metacells in a pile, allowing us to directly compute it                                 |
| min_target_pile_size                 | 10000                                       | Minimal target pile size (in cells), even if resulting with more metacells per pile                          |
| max_target_pile_size                 | 30000                                       | Maximal target pile size (in cells), even if resulting with less metacells per pile                          |
| max_cell_size                        | None                                        | The maximal cell size (total UMIs) to use                                                                    |
| max_cell_size_factor                 | X 2                                         | The maximal cell size as a factor of the median cell size                                                    |
| cell_sizes                           | $\frac{\_x\_}{\text{sum}}$<br>(Sum of UMIs) | The size of each cell for computing each metacell's size                                                     |
| target_metacell_size                 | 160000                                      | The target total metacell size (in UMIs)                                                                     |
| knn_k                                | None (Automatic)                            | The target K for building the K-Nearest-Neighbors graph                                                      |
| min_knn_k                            | 30                                          | The minimal target K for building the K-Nearest-Neighbors graph                                              |
| candidates_cooldown_pass             | 0.02                                        | By how much (as a fraction) to cooldown the temperature after doing a pass on all the nodes                  |
| candidates_cooldown_node             | 0.25                                        | By how much (as a fraction) to cooldown the node temperature after improving it                              |
| candidates_cooldown_phase            | 0.75                                        | By how much (as a fraction) to reduce the cooldown each time we re-optimize a slightly modified partition    |
| candidates_min_metacell_cells        | 12                                          | The minimal number of cells in a metacell, below which we would merge it                                     |
| must_complete_cover                  | FALSE                                       | Whether to force 100% coverage (disable outliers detection)                                                  |
| deviants_min_gene_fold_factor        | 3 (X 8)                                     | The minimal fold factor for a gene to indicate a cell is "deviant"                                           |
| deviants_max_gene_fraction           | 0.03 (3%)                                   | The maximal fraction of genes to use to indicate cell are "deviants"                                         |
| deviants_max_cell_fraction           | 0.25 (25%)                                  | The maximal fraction of cells to mark as "deviants"                                                          |
| dissolve_min_metacell_cells          | 12                                          | The minimal number of cells in a metacell, below which we would dissolve it                                  |
| random_seed                          | None (Irreproducible)                       | Optional integer random seed for reproducible results                                                        |
